# Supplementary material
Source: Springer Nature journal article supplement (https://www.springermedizin.de/resource/supplementary/13229_2014_130_MOESM10_ESM.pdf/9676242)
Supplement: MOESM10 [file 9676242]

## 1-Introduce a request

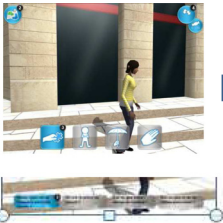

## 2-Correct response

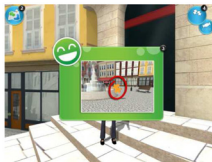

## 3-Reward

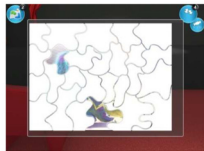

## 1-Appointment to the theater

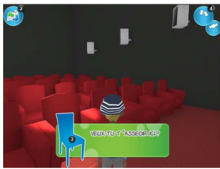

## 2-Choice and look a video of social scene

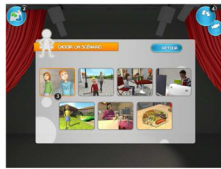

## 3-Express an emotion

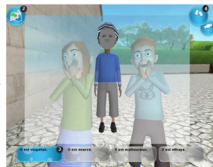

T  
R  
A  
I  
N  
I  
N  
G

P  
H  
A  
S  
E
